# Supplementary material
Source: PubMed Central journal article supplement (PMC3421619)
Supplement: AAC.00923-12_zac999101130so1.pdf [file AAC.00923-12_zac999101130so1.pdf]

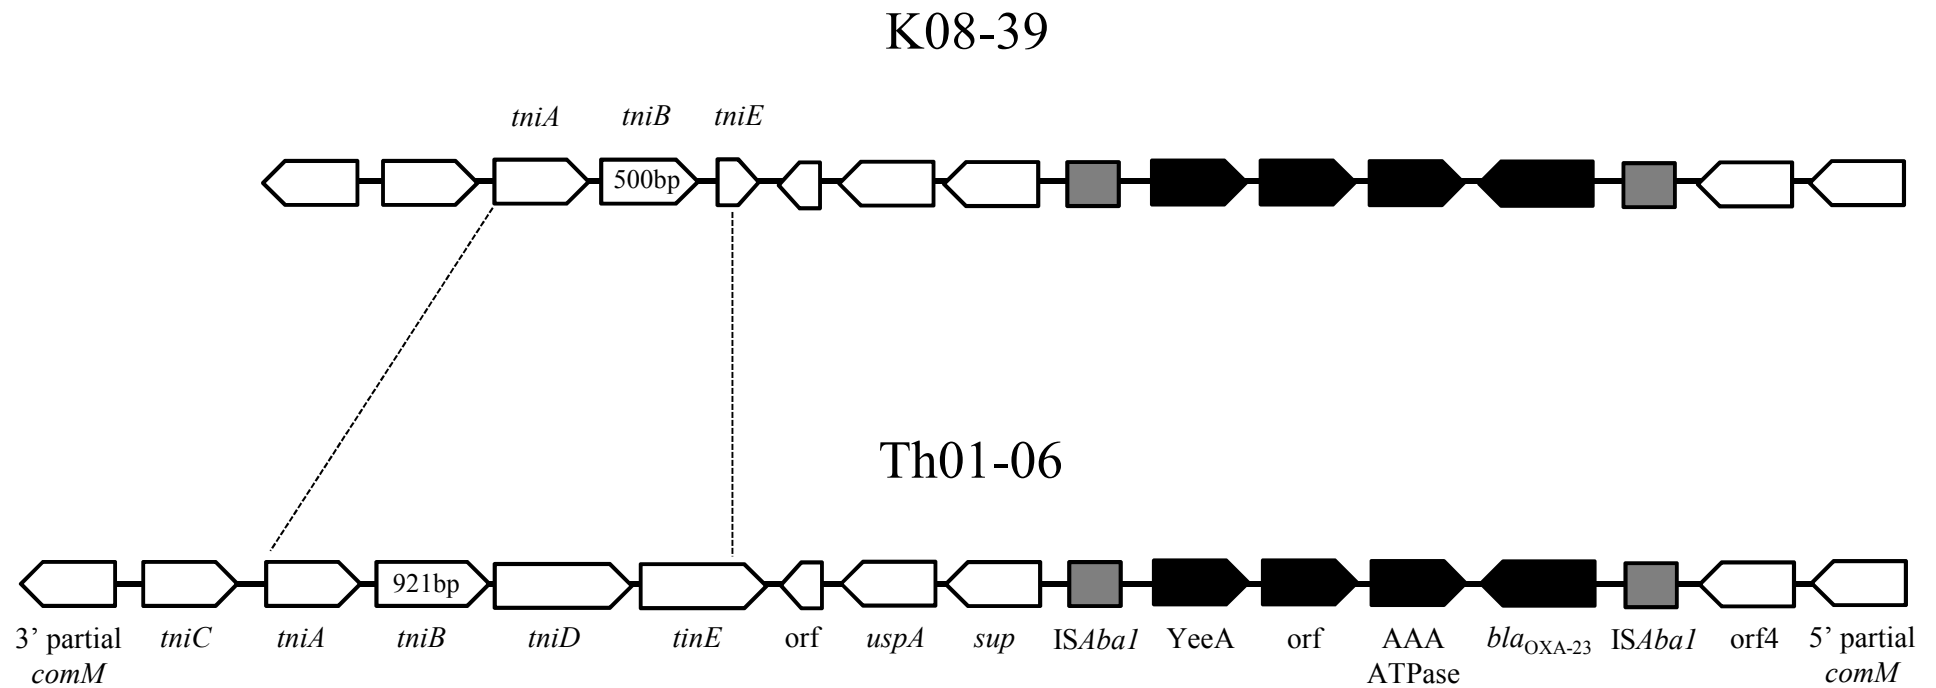

**Supplementary Figure 1.** The structure of AbaR4-type resistance islands of K08-39 and Th01-06. AbaR4 islands of ST75 are subdivided into two subtypes, D36-type and A210-type, according to presence or absence of *tniD* gene resulting in different fragment size of primer set spanning *tniA*-*tniE*.

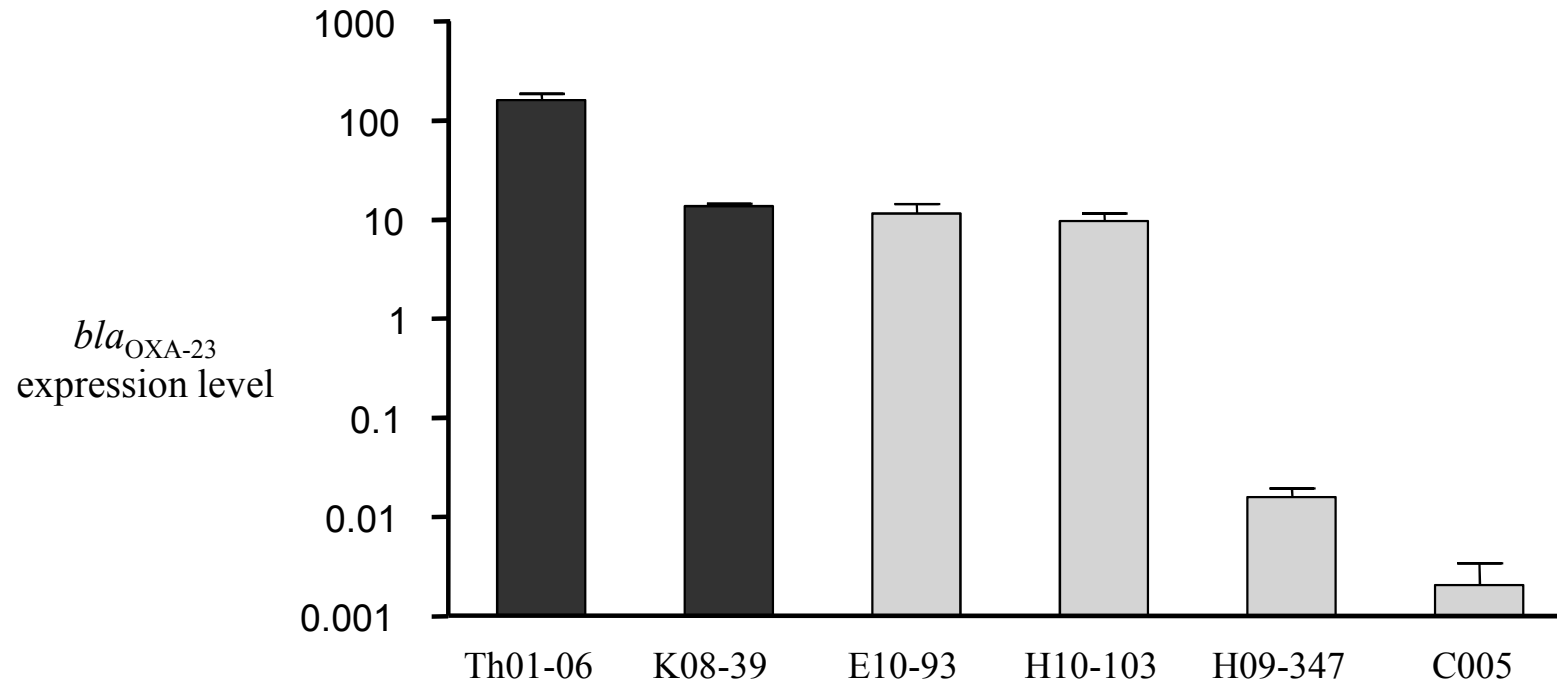

| Species                      | <i>A. nosocomialis</i> | <i>A. nosocomialis</i> | <i>A. baumannii</i> | <i>A. baumannii</i> | <i>A. baumannii</i> | <i>A. baumannii</i> |
|------------------------------|------------------------|------------------------|---------------------|---------------------|---------------------|---------------------|
| <i>bla</i> <sub>OXA-23</sub> | +                      | +                      | +                   | +                   | -                   | -                   |
| Imipenem                     | R                      | R                      | R                   | R                   | R                   | S                   |
| Meropenem                    | R                      | R                      | R                   | R                   | R                   | S                   |

**Supplementary Figure 2.** Comparison of the gene expression of *bla*<sub>OXA-23</sub> in two *bla*<sub>OXA-23</sub>-positive carbapenem-resistant *A. nosocomialis* isolates, two *bla*<sub>OXA-23</sub>-positive carbapenem-resistant *A. baumannii* isolates, one *bla*<sub>OXA-23</sub>-negative carbapenem-susceptible *A. baumannii* isolate, and one *bla*<sub>OXA-23</sub>-negative carbapenem-susceptible *A. baumannii* isolate. +, presence; -, absence; R, resistant; S, susceptible.
